# Supplementary material for: A chemiluminescence-based method for identification of histone lysine methyltransferase inhibitors
Source: Royal Society of Chemistry journal article supplement (doi:10.1039/b921912a), 2010-03-02
Supplement: b921912a.pdf [file b921912a.pdf]

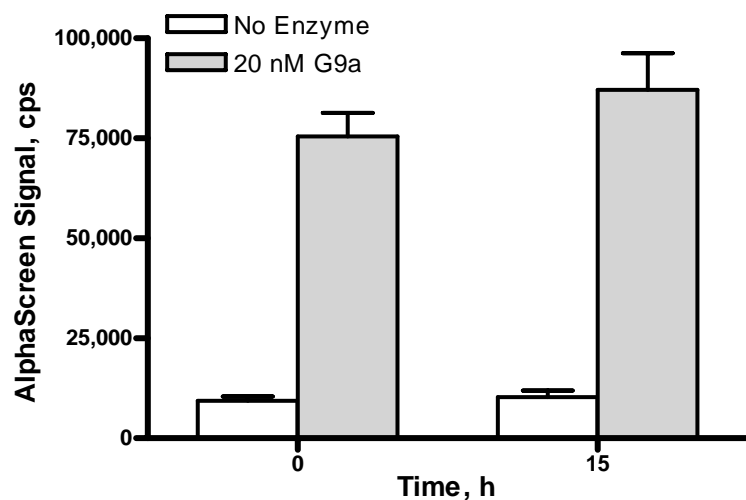

**Supplemental Figure 1.** Reagents for the methyltransferase assay are stable upon storage overnight at 4 °C. G9a methyltransferases reactions were performed with 20 nM enzyme, 20  $\mu$ M SAM, and 500 nM b-H3(1-11) peptide for 2 h in 384-well plate format. Reagents were assayed fresh (0 h) and following overnight storage (15 h) with no loss in enzymatic activity. Data represent the mean and standard deviation of 4 replicate measurements.

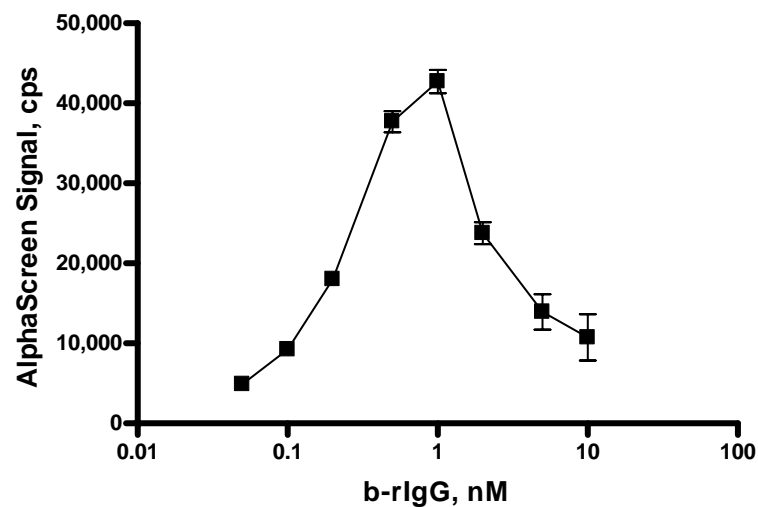

**Supplemental Figure 2.** Biotinylated rabbit IgG was titrated in triplicate in 384-well plates with 20  $\mu\text{g/mL}$  *anti*-rlgG antibody- and streptavidin-coated AlphaScreen beads. The AlphaScreen hook point occurs at concentrations of b-rlgG greater than 1 nM. The mean and standard deviation of 3 replicate measurements are shown.
